# Supplementary material for: Identification of miRNA-Mediated Core Gene Module for Glioma Patient Prediction by Integrating High-Throughput miRNA, mRNA Expression and Pathway Structure
Source: PubMed Central journal article supplement (PMC4014552; doi:10.1371/journal.pone.0096908), 2014-05-08

**A**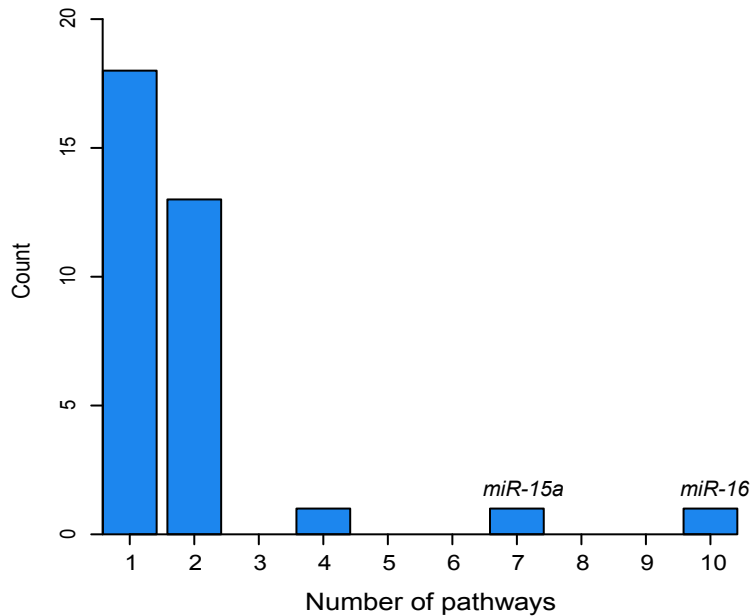**B**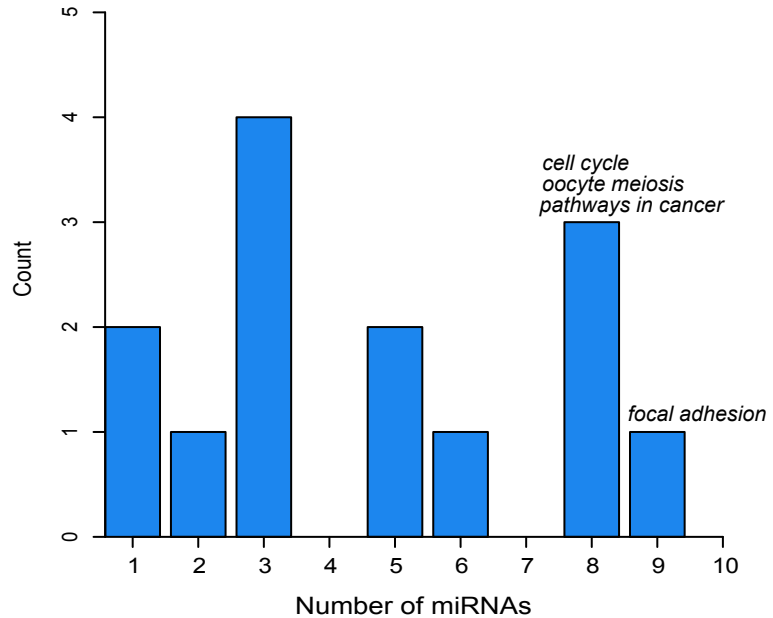

Supplement: pone.0096908.s002.pdf [file pone.0096908.s002.pdf]
